# Supplementary material for: Using variable-resolution grids to model precipitation from atmospheric rivers around the Greenland ice sheet
Source: Copernicus journal article supplement (doi:10.5194/egusphere-2023-2679), 2023-12-22

f19

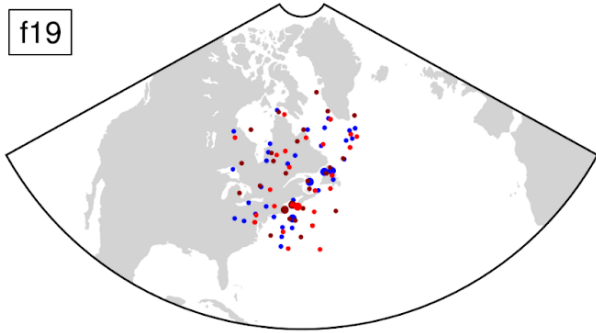

f09

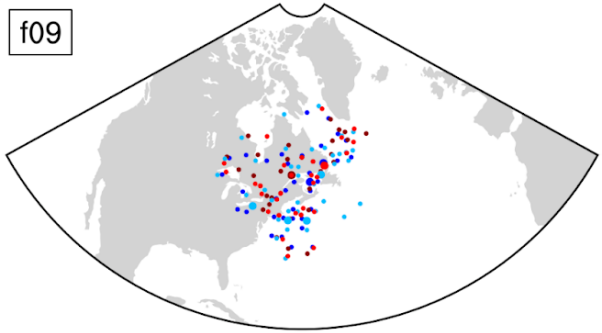

ne30pg2

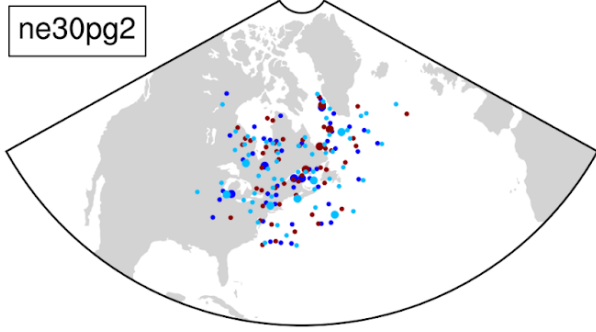

ne30pg3

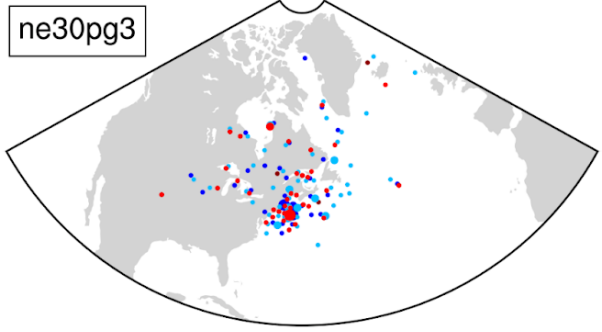

ARCTIC

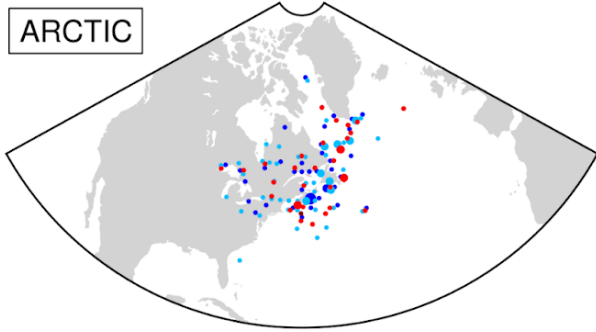

ARCTICGRIS

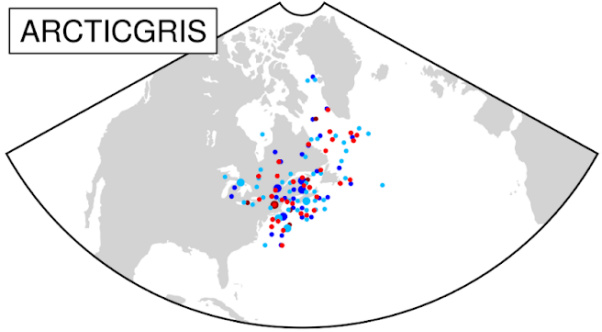

MERRA2

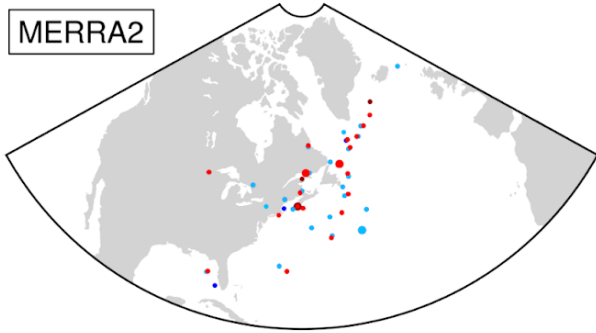

ERA5

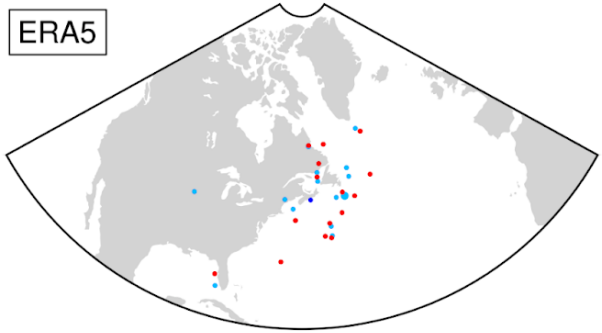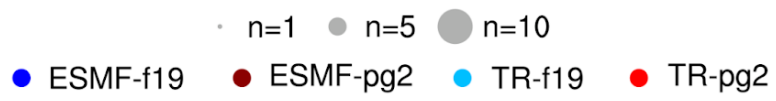

Supplement: Supplementary file [file egusphere-2023-2679-AC1-supplement.pdf]
